# Supplementary material
Source: Springer Nature journal article supplement (https://www.springermedizin.de/resource/supplementary/12887_2004_80_MOESM3_ESM.pdf/9477216)

Kaplan-Meier survival estimate  
95% pointwise confidence band show n

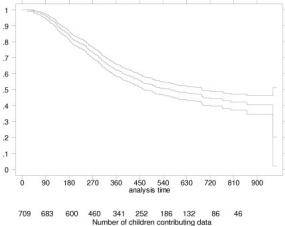

Supplement: MOESM3 [file 9477216]
